# Supplementary material for: The evolved nest in childhood: relation to adult well-being and social capital across cultures
Source: Research Square preprint supplement (doi:10.21203/rs.3.rs-8000260/v1), 2025-11-14
Supplement: Supplementary file 1 [file b642c57299d469e37e3d3863.pdf]

**Supplementary Information for: 'The evolved nest in childhood: relation to adult well-being and social capital across cultures'**

**Contents**

- 1) Extended Results
  - a) [H1: Developmental nestedness will be positively associated with personal well-being, social relationships, and general prosociality across cultures](#)
  - b) [H2: Developmental nestedness will be positively associated with incentivised prosociality across cultures](#)
  - c) [H3: Associations between childhood evolved nest experiences and adult well-being and social capital will be similar across cultures](#)
  - d) [H4: Latent factors in evolved nest experiences will predict adult well-being and social capital](#)
- 2) [Incentivised Prosociality Across Countries](#)
- 3) [Developmental Nestedness and Socioeconomic Status](#)
- 4) [Developmental Nestedness and Trust](#)
- 5) [Self-Reported vs. Incentivised Prosociality](#)

**H1: Developmental nestedness will be positively associated with personal well-being, social relationships, and general prosociality across cultures**

**Table S1. Developmental Nestedness and Personal Well-being After Controls**

Results from adjusted linear regression models that include controls for current household income and highest level of education. Note: \*\*\* $p < .001$ , \*\* $p < .01$ , \* $p < .05$ .

| Country | Term                    | Estimate | CI Low | CI High | SE   | <i>t</i> | <i>p</i>  |
|---------|-------------------------|----------|--------|---------|------|----------|-----------|
| All     | (Intercept)             | -0.47    | -0.65  | -0.29   | 0.09 | -5.05    | < .001*** |
|         | Evolved Nest Experience | 0.43     | 0.38   | 0.48    | 0.03 | 16.76    | < .001*** |
|         | Income                  | 0.17     | 0.10   | 0.24    | 0.04 | 4.69     | < .001*** |
|         | Education               | 0.02     | -0.01  | 0.05    | 0.01 | 1.39     | .166      |
| Japan   | (Intercept)             | -0.41    | -0.75  | -0.06   | 0.18 | -2.32    | .021*     |
|         | Evolved Nest Experience | 0.40     | 0.29   | 0.50    | 0.05 | 7.46     | < .001*** |
|         | Income                  | 0.11     | -0.02  | 0.23    | 0.06 | 1.66     | .097      |
|         | Education               | 0.07     | 0.00   | 0.14    | 0.04 | 1.86     | .064      |
| UK      | (Intercept)             | -0.70    | -1.04  | -0.36   | 0.17 | -4.04    | < .001*** |
|         | Evolved Nest Experience | 0.48     | 0.40   | 0.56    | 0.04 | 11.71    | < .001*** |
|         | Income                  | 0.18     | 0.05   | 0.31    | 0.07 | 2.71     | .007**    |
|         | Education               | 0.07     | 0.02   | 0.12    | 0.03 | 2.58     | .01*      |
| US      | (Intercept)             | -0.78    | -1.18  | -0.38   | 0.21 | -3.81    | < .001*** |
|         | Evolved Nest Experience | 0.41     | 0.32   | 0.49    | 0.04 | 9.47     | < .001*** |
|         | Income                  | 0.24     | 0.13   | 0.35    | 0.06 | 4.27     | < .001*** |
|         | Education               | 0.03     | -0.03  | 0.09    | 0.03 | 0.90     | .367      |

**Table S2. Developmental Nestedness and Personal Well-being Measures**

Results from mixed-effects models that include evolved nest experience, current household income, and highest level of education as fixed effects, and random intercepts at the country level to account for differences across regions. Note: \*\*\* $p < .001$ , \*\* $p < .01$ , \* $p < .05$ .

| Model                                        | Term                    | Estimate | CI Low | CI High | SE   | <i>t</i> | <i>p</i>   |
|----------------------------------------------|-------------------------|----------|--------|---------|------|----------|------------|
| <b>Health</b>                                | (Intercept)             | -0.64    | -0.94  | -0.34   | 0.14 | -4.64    | .001**     |
|                                              | Evolved Nest Experience | 0.31     | 0.26   | 0.37    | 0.03 | 11.20    | < .001***  |
|                                              | Income                  | 0.15     | 0.07   | 0.22    | 0.04 | 3.84     | < .001***  |
|                                              | Education               | 0.07     | 0.03   | 0.10    | 0.02 | 3.58     | < .001***  |
| <b>Life Satisfaction</b>                     | (Intercept)             | -0.80    | -1.09  | -0.51   | 0.13 | -6.06    | < .001***  |
|                                              | Evolved Nest Experience | 0.32     | 0.27   | 0.37    | 0.03 | 12.05    | < .001***  |
|                                              | Income                  | 0.26     | 0.19   | 0.33    | 0.04 | 7.10     | < .001***  |
|                                              | Education               | 0.05     | 0.01   | 0.08    | 0.02 | 2.69     | .007**     |
| <b>Life Worthwhile</b>                       | (Intercept)             | -0.53    | -0.81  | -0.25   | 0.13 | -4.03    | .001**     |
|                                              | Evolved Nest Experience | 0.29     | 0.23   | 0.34    | 0.03 | 10.26    | < .001***  |
|                                              | Income                  | 0.16     | 0.08   | 0.23    | 0.04 | 4.06     | < .001***  |
|                                              | Education               | 0.04     | 0.01   | 0.08    | 0.02 | 2.30     | .022*      |
| <b>Happiness Yesterday</b>                   | (Intercept)             | -0.62    | -0.86  | -0.38   | 0.12 | -5.34    | < .001***  |
|                                              | Evolved Nest Experience | 0.34     | 0.29   | 0.39    | 0.03 | 12.71    | < .001***  |
|                                              | Income                  | 0.23     | 0.16   | 0.30    | 0.04 | 6.17     | < .001***  |
|                                              | Education               | 0.02     | -0.01  | 0.06    | 0.02 | 1.36     | .176       |
| <b>Anxiety Yesterday (Reverse Scored)</b>    | (Intercept)             | -0.06    | -0.26  | 0.15    | 0.10 | -0.54    | .592       |
|                                              | Evolved Nest Experience | 0.28     | 0.22   | 0.34    | 0.03 | 9.80     | < .001***0 |
|                                              | Income                  | 0.05     | -0.03  | 0.13    | 0.04 | 1.31     | .192       |
|                                              | Education               | -0.02    | -0.05  | 0.02    | 0.02 | -0.91    | .362       |
| <b>Belief World is Good</b>                  | (Intercept)             | -0.37    | -0.62  | -0.13   | 0.12 | -3.14    | .005**     |
|                                              | Evolved Nest Experience | 0.34     | 0.28   | 0.39    | 0.03 | 12.13    | < .001***  |
|                                              | Income                  | 0.08     | 0.00   | 0.15    | 0.04 | 2.00     | .046*      |
|                                              | Education               | 0.04     | 0.01   | 0.08    | 0.02 | 2.51     | .013*      |
| <b>Belief World is Safe</b>                  | (Intercept)             | -0.64    | -0.95  | -0.33   | 0.14 | -4.58    | .001**     |
|                                              | Evolved Nest Experience | 0.28     | 0.23   | 0.34    | 0.03 | 9.88     | < .001***  |
|                                              | Income                  | 0.11     | 0.04   | 0.19    | 0.04 | 2.86     | .004**     |
|                                              | Education               | 0.08     | 0.05   | 0.12    | 0.02 | 4.48     | < .001***  |
| <b>Belief World is Enticing</b>              | (Intercept)             | 0.11     | -0.09  | 0.31    | 0.10 | 1.05     | .295       |
|                                              | Evolved Nest Experience | 0.29     | 0.24   | 0.35    | 0.03 | 10.29    | < .001***  |
|                                              | Income                  | -0.01    | -0.09  | 0.07    | 0.04 | -0.29    | .772       |
|                                              | Education               | -0.01    | -0.04  | 0.02    | 0.02 | -0.80    | .425       |
| <b>Belief World is Alive</b>                 | (Intercept)             | -0.38    | -0.61  | -0.14   | 0.11 | -3.36    | .003**     |
|                                              | Evolved Nest Experience | 0.16     | 0.10   | 0.21    | 0.03 | 5.32     | < .001***  |
|                                              | Income                  | 0.11     | 0.03   | 0.19    | 0.04 | 2.72     | .007**     |
|                                              | Education               | 0.02     | -0.01  | 0.06    | 0.02 | 1.33     | .196       |
| <b>Relative Deprivation (Reverse Scored)</b> | (Intercept)             | -0.07    | -0.29  | 0.14    | 0.11 | -0.69    | .496       |
|                                              | Evolved Nest Experience | 0.28     | 0.23   | 0.34    | 0.03 | 9.99     | < .001***  |
|                                              | Income                  | 0.03     | -0.04  | 0.11    | 0.04 | 0.82     | .414       |
|                                              | Education               | 0.00     | -0.03  | 0.03    | 0.02 | 0.06     | .951       |

**Table S3. Developmental Nestedness and Social Relationships After Controls**

Results from adjusted linear regression models that include controls for current household income and highest level of education. Note: \*\*\* $p < .001$ , \*\* $p < .01$ , \* $p < .05$ .

| Country | Term                    | Estimate | CI Low | CI High | SE   | <i>t</i> | <i>p</i>  |
|---------|-------------------------|----------|--------|---------|------|----------|-----------|
| All     | (Intercept)             | -0.37    | -0.56  | -0.19   | 0.09 | -3.95    | < .001*** |
|         | Evolved Nest Experience | 0.45     | 0.40   | 0.50    | 0.03 | 17.40    | < .001*** |
|         | Income                  | 0.13     | 0.06   | 0.20    | 0.04 | 3.74     | < .001*** |
|         | Education               | 0.02     | -0.01  | 0.04    | 0.02 | 1.10     | .273      |
| Japan   | (Intercept)             | -0.30    | -0.65  | 0.04    | 0.18 | -1.73    | .085      |
|         | Evolved Nest Experience | 0.33     | 0.23   | 0.44    | 0.05 | 6.28     | < .001*** |
|         | Income                  | 0.12     | -0.01  | 0.24    | 0.06 | 1.85     | .065      |
|         | Education               | 0.02     | -0.05  | 0.09    | 0.04 | 0.57     | .573      |
| UK      | (Intercept)             | -0.70    | -1.05  | -0.35   | 0.18 | -3.94    | < .001*** |
|         | Evolved Nest Experience | 0.51     | 0.43   | 0.59    | 0.04 | 12.22    | < .001*** |
|         | Income                  | 0.18     | 0.04   | 0.31    | 0.07 | 2.60     | .01*      |
|         | Education               | 0.07     | 0.02   | 0.13    | 0.03 | 2.70     | .007**    |
| US      | (Intercept)             | -0.38    | -0.79  | 0.02    | 0.21 | -1.86    | .063      |
|         | Evolved Nest Experience | 0.49     | 0.40   | 0.57    | 0.04 | 11.25    | < .001*** |
|         | Income                  | 0.16     | 0.05   | 0.27    | 0.06 | 2.81     | .005**    |
|         | Education               | 0.00     | -0.06  | 0.06    | 0.03 | 0.00     | .999      |

**Table S4. Developmental Nestedness and Social Relationships Measures**

Results from mixed-effects models that include evolved nest experience, current household income, and highest level of education as fixed effects, and random intercepts at the country level to account for differences across regions. Note: \*\*\* $p < .001$ , \*\* $p < .01$ , \* $p < .05$ .

| Model                                       | Term                    | Estimate | CI Low | CI High | SE   | <i>t</i> | <i>p</i>  |
|---------------------------------------------|-------------------------|----------|--------|---------|------|----------|-----------|
| <b>Trust</b>                                | (Intercept)             | -0.46    | -0.73  | -0.19   | 0.13 | -3.65    | .003**    |
|                                             | Evolved Nest Experience | 0.38     | 0.33   | 0.43    | 0.03 | 14.08    | < .001*** |
|                                             | Income                  | 0.07     | 0.00   | 0.14    | 0.04 | 1.95     | .051      |
|                                             | Education               | 0.07     | 0.03   | 0.10    | 0.02 | 3.90     | < .001*** |
| <b>Relationships Satisfaction</b>           | (Intercept)             | -0.41    | -0.63  | -0.19   | 0.11 | -3.78    | .001***   |
|                                             | Evolved Nest Experience | 0.40     | 0.35   | 0.45    | 0.03 | 14.90    | < .001*** |
|                                             | Income                  | 0.16     | 0.09   | 0.23    | 0.04 | 4.38     | < .001*** |
|                                             | Education               | 0.01     | -0.02  | 0.05    | 0.02 | 0.72     | .476      |
| <b>Secure Attachment</b>                    | (Intercept)             | -0.29    | -0.55  | -0.03   | 0.12 | -2.35    | .029*     |
|                                             | Evolved Nest Experience | 0.20     | 0.14   | 0.25    | 0.03 | 6.77     | < .001*** |
|                                             | Income                  | 0.05     | -0.03  | 0.13    | 0.04 | 1.32     | .189      |
|                                             | Education               | 0.04     | 0.00   | 0.08    | 0.02 | 2.18     | .03*      |
| <b>Avoidant Attachment (Reverse Scored)</b> | (Intercept)             | 0.18     | -0.07  | 0.42    | 0.12 | 1.49     | .15       |
|                                             | Evolved Nest Experience | 0.02     | -0.04  | 0.08    | 0.03 | 0.78     | .434      |
|                                             | Income                  | -0.07    | -0.15  | 0.01    | 0.04 | -1.67    | .095      |
|                                             | Education               | -0.01    | -0.04  | 0.03    | 0.02 | -0.35    | .728      |
| <b>Anxious Attachment (Reverse Scored)</b>  | (Intercept)             | -0.01    | -0.22  | 0.20    | 0.11 | -0.11    | .91       |
|                                             | Evolved Nest Experience | 0.11     | 0.06   | 0.17    | 0.03 | 3.85     | < .001*** |
|                                             | Income                  | 0.03     | -0.05  | 0.10    | 0.04 | 0.63     | .526      |
|                                             | Education               | -0.02    | -0.05  | 0.02    | 0.02 | -0.92    | .36       |
| <b>Fearful Attachment (Reverse Scored)</b>  | (Intercept)             | -0.26    | -0.46  | -0.06   | 0.10 | -2.50    | .013*     |
|                                             | Evolved Nest Experience | 0.25     | 0.19   | 0.30    | 0.03 | 8.72     | < .001*** |
|                                             | Income                  | 0.12     | 0.04   | 0.20    | 0.04 | 3.08     | .002**    |
|                                             | Education               | 0.00     | -0.03  | 0.03    | 0.02 | -0.18    | .854      |
| <b>Neighbourhood Belonging</b>              | (Intercept)             | -0.45    | -0.67  | -0.22   | 0.11 | -4.05    | .001**    |
|                                             | Evolved Nest Experience | 0.29     | 0.24   | 0.35    | 0.03 | 10.39    | < .001*** |
|                                             | Income                  | 0.15     | 0.07   | 0.22    | 0.04 | 3.82     | < .001*** |
|                                             | Education               | 0.03     | -0.01  | 0.06    | 0.02 | 1.50     | .141      |
| <b>Ability to Rely on Others</b>            | (Intercept)             | -0.19    | -0.38  | 0.01    | 0.10 | -1.89    | .059      |
|                                             | Evolved Nest Experience | 0.36     | 0.31   | 0.41    | 0.03 | 13.03    | < .001*** |
|                                             | Income                  | 0.09     | 0.01   | 0.16    | 0.04 | 2.26     | .024*     |
|                                             | Education               | 0.00     | -0.03  | 0.03    | 0.02 | 0.10     | .924      |

**Table S5. Developmental Nestedness and General Prosociality After Controls**

Results from adjusted linear regression models that include controls for current household income and highest level of education. Note: \*\*\* $p < .001$ , \*\* $p < .01$ , \* $p < .05$ .

| Country | Term                    | Estimate | CI Low | CI High | SE   | <i>t</i> | <i>p</i>  |
|---------|-------------------------|----------|--------|---------|------|----------|-----------|
| All     | (Intercept)             | -0.23    | -0.43  | -0.03   | 0.10 | -2.24    | 0.026*    |
|         | Evolved Nest Experience | 0.21     | 0.16   | 0.27    | 0.03 | 7.44     | < .001*** |
|         | Income                  | 0.13     | 0.05   | 0.20    | 0.04 | 3.25     | .001**    |
|         | Education               | -0.01    | -0.04  | 0.02    | 0.02 | -0.62    | .535      |
| Japan   | (Intercept)             | -0.19    | -0.55  | 0.17    | 0.19 | -1.03    | .305      |
|         | Evolved Nest Experience | 0.20     | 0.09   | 0.31    | 0.06 | 3.61     | < .001*** |
|         | Income                  | 0.09     | -0.04  | 0.22    | 0.07 | 1.32     | .187      |
|         | Education               | 0.02     | -0.05  | 0.09    | 0.04 | 0.50     | .615      |
| UK      | (Intercept)             | -0.30    | -0.70  | 0.10    | 0.20 | -1.50    | .135      |
|         | Evolved Nest Experience | 0.21     | 0.12   | 0.31    | 0.05 | 4.41     | < .001*** |
|         | Income                  | 0.11     | -0.04  | 0.27    | 0.08 | 1.43     | .153      |
|         | Education               | 0.01     | -0.05  | 0.07    | 0.03 | 0.40     | .693      |
| US      | (Intercept)             | -0.36    | -0.80  | 0.08    | 0.22 | -1.63    | .105      |
|         | Evolved Nest Experience | 0.22     | 0.13   | 0.31    | 0.05 | 4.66     | < .001*** |
|         | Income                  | 0.18     | 0.06   | 0.30    | 0.06 | 3.01     | .003**    |
|         | Education               | -0.02    | -0.08  | 0.05    | 0.03 | -0.51    | .611      |

**Table S6. Developmental Nestedness and General Prosociality Measures**

Results from mixed-effects models that include evolved nest experience, current household income, and highest level of education as fixed effects, and random intercepts at the country level to account for differences across regions. Note: \*\*\* $p < .001$ , \*\* $p < .01$ , \* $p < .05$ .

| Model                                               | Term                    | Estimate | CI Low | CI High | SE   | <i>t</i> | <i>p</i>  |
|-----------------------------------------------------|-------------------------|----------|--------|---------|------|----------|-----------|
| <b>Altruism</b>                                     | (Intercept)             | -0.04    | -0.25  | 0.16    | 0.11 | -0.41    | .679      |
|                                                     | Evolved Nest Experience | 0.12     | 0.06   | 0.18    | 0.03 | 3.99     | < .001*** |
|                                                     | Income                  | 0.03     | -0.05  | 0.11    | 0.04 | 0.82     | .412      |
|                                                     | Education               | -0.01    | -0.04  | 0.03    | 0.02 | -0.40    | .692      |
| <b>Positive Reciprocity</b>                         | (Intercept)             | 0.02     | -0.18  | 0.23    | 0.11 | 0.21     | .834      |
|                                                     | Evolved Nest Experience | 0.12     | 0.07   | 0.18    | 0.03 | 4.30     | < .001*** |
|                                                     | Income                  | 0.06     | -0.02  | 0.13    | 0.04 | 1.41     | .159      |
|                                                     | Education               | -0.03    | -0.06  | 0.00    | 0.02 | -1.78    | .075      |
| <b>Strong Negative Reciprocity (Reverse Scored)</b> | (Intercept)             | 0.16     | -0.04  | 0.37    | 0.11 | 1.54     | .123      |
|                                                     | Evolved Nest Experience | 0.13     | 0.07   | 0.19    | 0.03 | 4.52     | < .001*** |
|                                                     | Income                  | -0.02    | -0.10  | 0.06    | 0.04 | -0.45    | .656      |
|                                                     | Education               | -0.02    | -0.06  | 0.01    | 0.02 | -1.46    | .146      |
| <b>Weak Negative Reciprocity (Reverse Scored)</b>   | (Intercept)             | 0.06     | -0.15  | 0.27    | 0.11 | 0.52     | .602      |
|                                                     | Evolved Nest Experience | 0.06     | 0.00   | 0.12    | 0.03 | 1.98     | .048*     |
|                                                     | Income                  | -0.02    | -0.10  | 0.06    | 0.04 | -0.48    | .63       |
|                                                     | Education               | -0.01    | -0.04  | 0.03    | 0.02 | -0.36    | .722      |
| <b>Risk Attitude (Self-Reported)</b>                | (Intercept)             | -0.41    | -0.66  | -0.17   | 0.12 | -3.49    | .002**    |
|                                                     | Evolved Nest Experience | 0.10     | 0.04   | 0.16    | 0.03 | 3.38     | .001**    |
|                                                     | Income                  | 0.14     | 0.06   | 0.21    | 0.04 | 3.36     | .001**    |
|                                                     | Education               | 0.02     | -0.01  | 0.06    | 0.02 | 1.35     | .182      |
| <b>Risk Attitude (Elicited)</b>                     | (Intercept)             | -0.22    | -0.42  | -0.02   | 0.10 | -2.13    | .034*     |
|                                                     | Evolved Nest Experience | 0.04     | -0.02  | 0.10    | 0.03 | 1.42     | .156      |
|                                                     | Income                  | 0.10     | 0.02   | 0.18    | 0.04 | 2.58     | .01*      |
|                                                     | Education               | -0.01    | -0.04  | 0.03    | 0.02 | -0.30    | .768      |
| <b>Patience (Self-Reported)</b>                     | (Intercept)             | -0.16    | -0.36  | 0.05    | 0.11 | -1.48    | .138      |
|                                                     | Evolved Nest Experience | 0.13     | 0.07   | 0.18    | 0.03 | 4.29     | < .001*** |
|                                                     | Income                  | 0.11     | 0.03   | 0.19    | 0.04 | 2.73     | .006**    |
|                                                     | Education               | -0.02    | -0.05  | 0.02    | 0.02 | -0.91    | .364      |
| <b>Patience (Elicited)</b>                          | (Intercept)             | -0.34    | -0.59  | -0.09   | 0.12 | -2.78    | .011*     |
|                                                     | Evolved Nest Experience | 0.07     | 0.01   | 0.13    | 0.03 | 2.43     | .015*     |
|                                                     | Income                  | 0.02     | -0.06  | 0.10    | 0.04 | 0.45     | .655      |
|                                                     | Education               | 0.06     | 0.02   | 0.10    | 0.02 | 3.27     | .002**    |
| <b>Volunteered</b>                                  | (Intercept)             | -0.44    | -0.76  | -0.13   | 0.15 | -3.06    | .01*      |
|                                                     | Evolved Nest Experience | 0.08     | 0.02   | 0.14    | 0.03 | 2.63     | .009**    |
|                                                     | Income                  | 0.05     | -0.04  | 0.13    | 0.04 | 1.11     | .268      |
|                                                     | Education               | 0.08     | 0.04   | 0.12    | 0.02 | 3.90     | < .001*** |
| <b>No Say in Government</b>                         | (Intercept)             | 0.32     | 0.05   | 0.60    | 0.13 | 2.48     | .023*     |
|                                                     | Evolved Nest Experience | -0.06    | -0.12  | 0.00    | 0.03 | -1.97    | .049*     |
|                                                     | Income                  | 0.02     | -0.06  | 0.10    | 0.04 | 0.41     | .683      |
|                                                     | Education               | -0.07    | -0.11  | -0.04   | 0.02 | -3.90    | < .001*** |

## H2: Developmental nestedness will be positively associated with incentivised prosociality across cultures

**Table S7. Developmental Nestedness and Incentivised Prosociality After Controls**

Results from adjusted linear regression models that include controls for current household income and highest level of education. Note: \*\*\* $p < .001$ , \*\* $p < .01$ , \* $p < .05$ .

| Country | Term                    | Estimate | CI Low | CI High | SE   | <i>t</i> | <i>p</i> |
|---------|-------------------------|----------|--------|---------|------|----------|----------|
| All     | (Intercept)             | 0.06     | -0.16  | 0.27    | 0.11 | 0.53     | .598     |
|         | Evolved Nest Experience | 0.04     | -0.02  | 0.10    | 0.03 | 1.36     | .175     |
|         | Income                  | -0.02    | -0.10  | 0.06    | 0.04 | -0.43    | .667     |
|         | Education               | 0.00     | -0.03  | 0.03    | 0.02 | -0.09    | .929     |
| Japan   | (Intercept)             | -0.09    | -0.47  | 0.29    | 0.19 | -0.46    | .646     |
|         | Evolved Nest Experience | 0.00     | -0.12  | 0.11    | 0.06 | -0.03    | .977     |
|         | Income                  | 0.06     | -0.07  | 0.20    | 0.07 | 0.93     | .353     |
|         | Education               | 0.00     | -0.08  | 0.08    | 0.04 | -0.02    | .981     |
| UK      | (Intercept)             | 0.15     | -0.26  | 0.57    | 0.21 | 0.72     | .473     |
|         | Evolved Nest Experience | 0.06     | -0.03  | 0.16    | 0.05 | 1.29     | .197     |
|         | Income                  | -0.07    | -0.22  | 0.09    | 0.08 | -0.81    | .420     |
|         | Education               | 0.00     | -0.06  | 0.06    | 0.03 | 0.05     | .961     |
| US      | (Intercept)             | -0.05    | -0.52  | 0.42    | 0.24 | -0.21    | .837     |
|         | Evolved Nest Experience | 0.04     | -0.06  | 0.13    | 0.05 | 0.69     | .489     |
|         | Income                  | -0.05    | -0.18  | 0.08    | 0.07 | -0.79    | .432     |
|         | Education               | 0.03     | -0.04  | 0.09    | 0.04 | 0.72     | .473     |



**Table S8. Developmental Nestedness and Incentivised Prosociality Measures**

Results from mixed-effects models that include evolved nest experience, current household income, and highest level of education as fixed effects, and random intercepts at the country level to account for differences across regions. Note: \*\*\* $p < .001$ , \*\* $p < .01$ , \* $p < .05$ .

| Model                                                  | Term                    | Estimate | CI Low | CI High | SE   | <i>t</i> | <i>p</i> |
|--------------------------------------------------------|-------------------------|----------|--------|---------|------|----------|----------|
| <b>Trust (Amount Sent in TG)</b>                       | (Intercept)             | -0.14    | -0.51  | 0.23    | 0.18 | -0.81    | .426     |
|                                                        | Evolved Nest Experience | 0.03     | -0.06  | 0.12    | 0.05 | 0.70     | .482     |
|                                                        | Income                  | -0.01    | -0.14  | 0.11    | 0.06 | -0.22    | .824     |
|                                                        | Education               | 0.05     | -0.01  | 0.11    | 0.03 | 1.69     | .112     |
| <b>Positive Reciprocity (% Returned in TG)</b>         | (Intercept)             | -0.12    | -0.46  | 0.22    | 0.17 | -0.69    | .491     |
|                                                        | Evolved Nest Experience | 0.00     | -0.09  | 0.10    | 0.05 | 0.06     | .953     |
|                                                        | Income                  | 0.01     | -0.12  | 0.14    | 0.07 | 0.15     | .882     |
|                                                        | Education               | 0.01     | -0.04  | 0.06    | 0.03 | 0.50     | .621     |
| <b>Altruism I (Given in DG)</b>                        | (Intercept)             | -0.03    | -0.24  | 0.18    | 0.11 | -0.27    | .784     |
|                                                        | Evolved Nest Experience | 0.06     | 0.00   | 0.12    | 0.03 | 1.94     | .052     |
|                                                        | Income                  | 0.01     | -0.08  | 0.09    | 0.04 | 0.13     | .896     |
|                                                        | Education               | 0.00     | -0.03  | 0.03    | 0.02 | 0.09     | .932     |
| <b>Altruism II (Taken in DG)</b>                       | (Intercept)             | 0.12     | -0.09  | 0.33    | 0.11 | 1.13     | .259     |
|                                                        | Evolved Nest Experience | 0.02     | -0.04  | 0.08    | 0.03 | 0.65     | .519     |
|                                                        | Income                  | -0.07    | -0.15  | 0.01    | 0.04 | -1.71    | .088     |
|                                                        | Education               | 0.00     | -0.03  | 0.04    | 0.02 | 0.12     | .902     |
| <b>Altruism III (Offered in UG)</b>                    | (Intercept)             | 0.22     | -0.15  | 0.58    | 0.19 | 1.17     | .244     |
|                                                        | Evolved Nest Experience | 0.03     | -0.07  | 0.12    | 0.05 | 0.55     | .585     |
|                                                        | Income                  | -0.09    | -0.23  | 0.05    | 0.07 | -1.23    | .22      |
|                                                        | Education               | 0.00     | -0.06  | 0.05    | 0.03 | -0.03    | .98      |
| <b>Negative Reciprocity (Min Offer Accepted in UG)</b> | (Intercept)             | 0.07     | -0.28  | 0.41    | 0.18 | 0.40     | .691     |
|                                                        | Evolved Nest Experience | -0.06    | -0.16  | 0.04    | 0.05 | -1.23    | .221     |
|                                                        | Income                  | 0.00     | -0.13  | 0.13    | 0.07 | 0.05     | .959     |
|                                                        | Education               | -0.01    | -0.06  | 0.05    | 0.03 | -0.31    | .754     |
| <b>Cooperation (Expectation in PGG)</b>                | (Intercept)             | 0.23     | -0.05  | 0.50    | 0.14 | 1.60     | .111     |
|                                                        | Evolved Nest Experience | 0.03     | -0.04  | 0.10    | 0.04 | 0.80     | .424     |
|                                                        | Income                  | -0.03    | -0.13  | 0.08    | 0.05 | -0.51    | .613     |
|                                                        | Education               | -0.03    | -0.07  | 0.01    | 0.02 | -1.47    | .142     |
| <b>Cooperation (Contribution in PGG)</b>               | (Intercept)             | 0.18     | -0.10  | 0.45    | 0.14 | 1.24     | .216     |
|                                                        | Evolved Nest Experience | 0.01     | -0.07  | 0.08    | 0.04 | 0.16     | .871     |
|                                                        | Income                  | -0.01    | -0.12  | 0.09    | 0.05 | -0.25    | .803     |
|                                                        | Education               | -0.03    | -0.07  | 0.01    | 0.02 | -1.32    | .188     |
| <b>Honesty (Heads Reported in CF)</b>                  | (Intercept)             | -0.17    | -0.40  | 0.06    | 0.11 | -1.55    | .133     |
|                                                        | Evolved Nest Experience | 0.03     | -0.03  | 0.09    | 0.03 | 0.94     | .349     |
|                                                        | Income                  | 0.07     | 0.00   | 0.15    | 0.04 | 1.86     | .063     |
|                                                        | Education               | 0.01     | -0.03  | 0.04    | 0.02 | 0.30     | .77      |

### H3: Associations between childhood evolved nest experiences and adult well-being and social capital will be similar across cultures

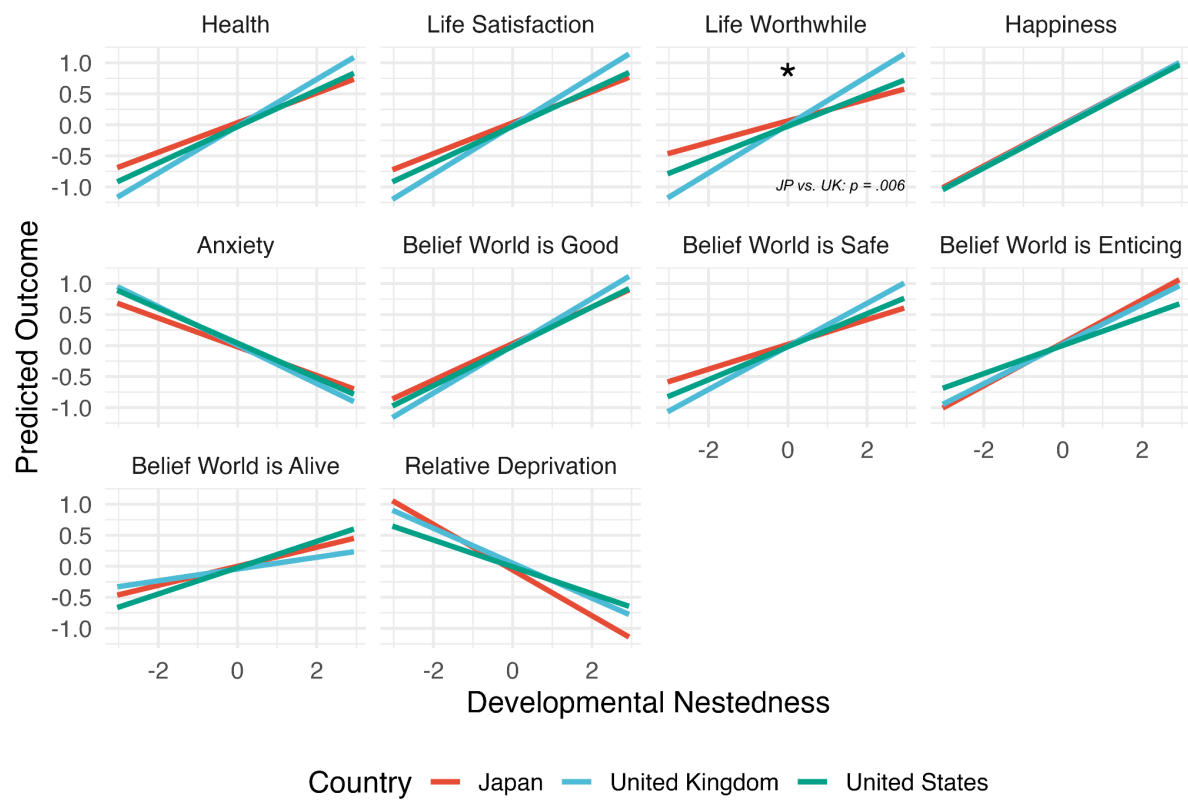

**Figure S1. Nestedness and Personal Well-being Slopes Across Countries**

Plots show relationships between standardised developmental nestedness scores and standardised measures of personal well-being in each country. Slopes were equivalent across countries for all measures except life being worthwhile, where the slope was significantly steeper in the UK compared with Japan.

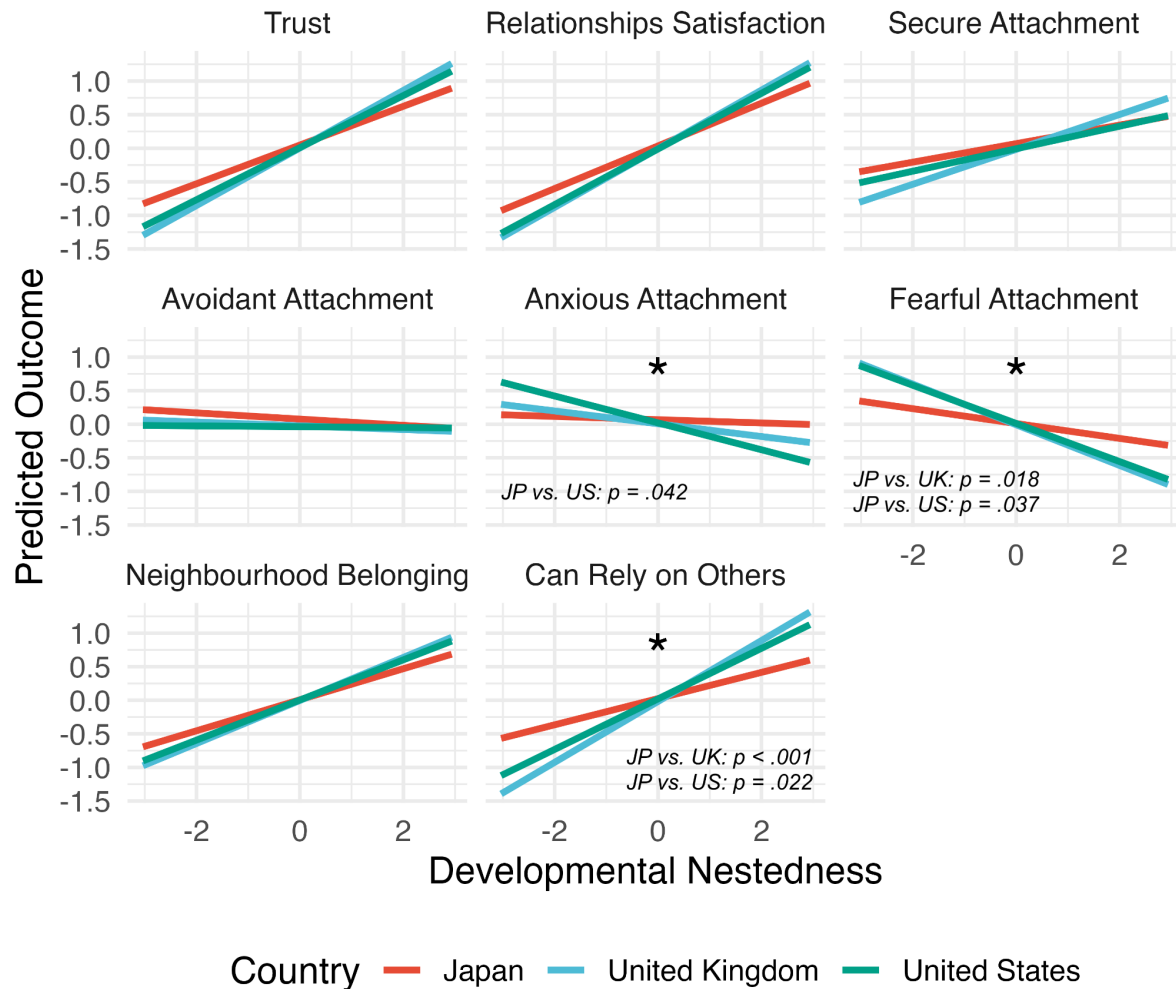

**Figure S2. Nestedness and Social Relationships Slopes Across Countries**

Plots show relationship between standardised developmental nestedness scores and standardised measures of social relationships in each country. Slopes were equivalent for trust, satisfaction with relationships, secure attachment, avoidant attachment, and neighbourhood belonging. Nestedness was more strongly associated with significantly less anxious and fearful attachment in the US vs. Japan. It was also more strongly associated with less fearful attachment in the UK than in Japan. Lastly, nestedness more strongly predicted people's ability to rely on others in the UK and the US compared with Japan.

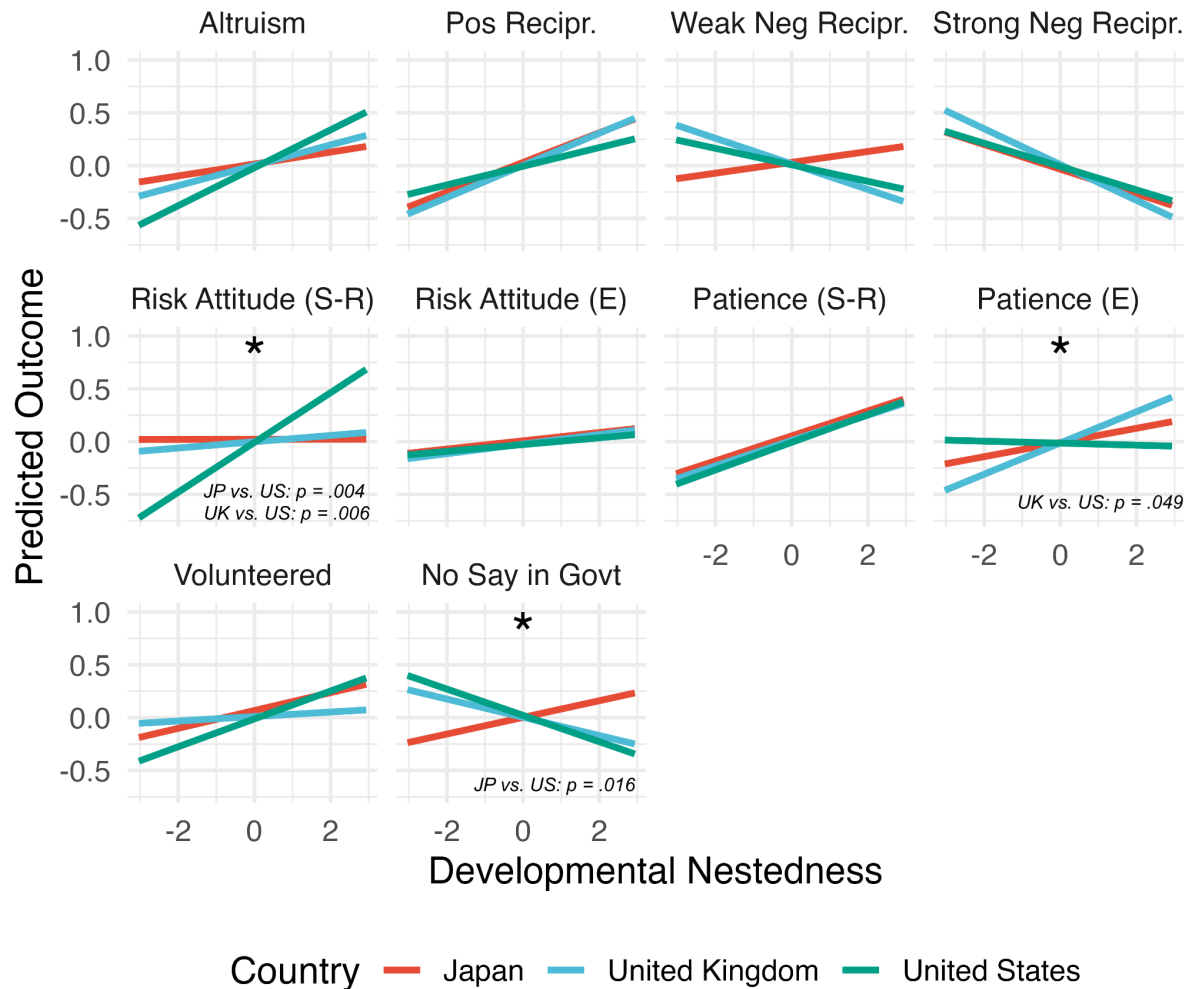

**Figure S3. Nestedness and General Prosociality Slopes Across Countries**

Plots show relationship between standardised developmental nestedness scores and standardised measures of general prosociality in each country. Slopes were statistically equivalent for altruism, positive reciprocity, weak and strong negative reciprocity, elicited (E) risk attitudes, self-reported (S-R) patience, and volunteering. Nestedness was more strongly associated with self-reported (S-R) risk attitudes in the US compared with Japan and the UK. It was more strongly associated with elicited (E) patience in the UK than in the US. People's nestedness was negatively associated with their feeling like they had no say in what the government did in the UK and the US, unlike in Japan.

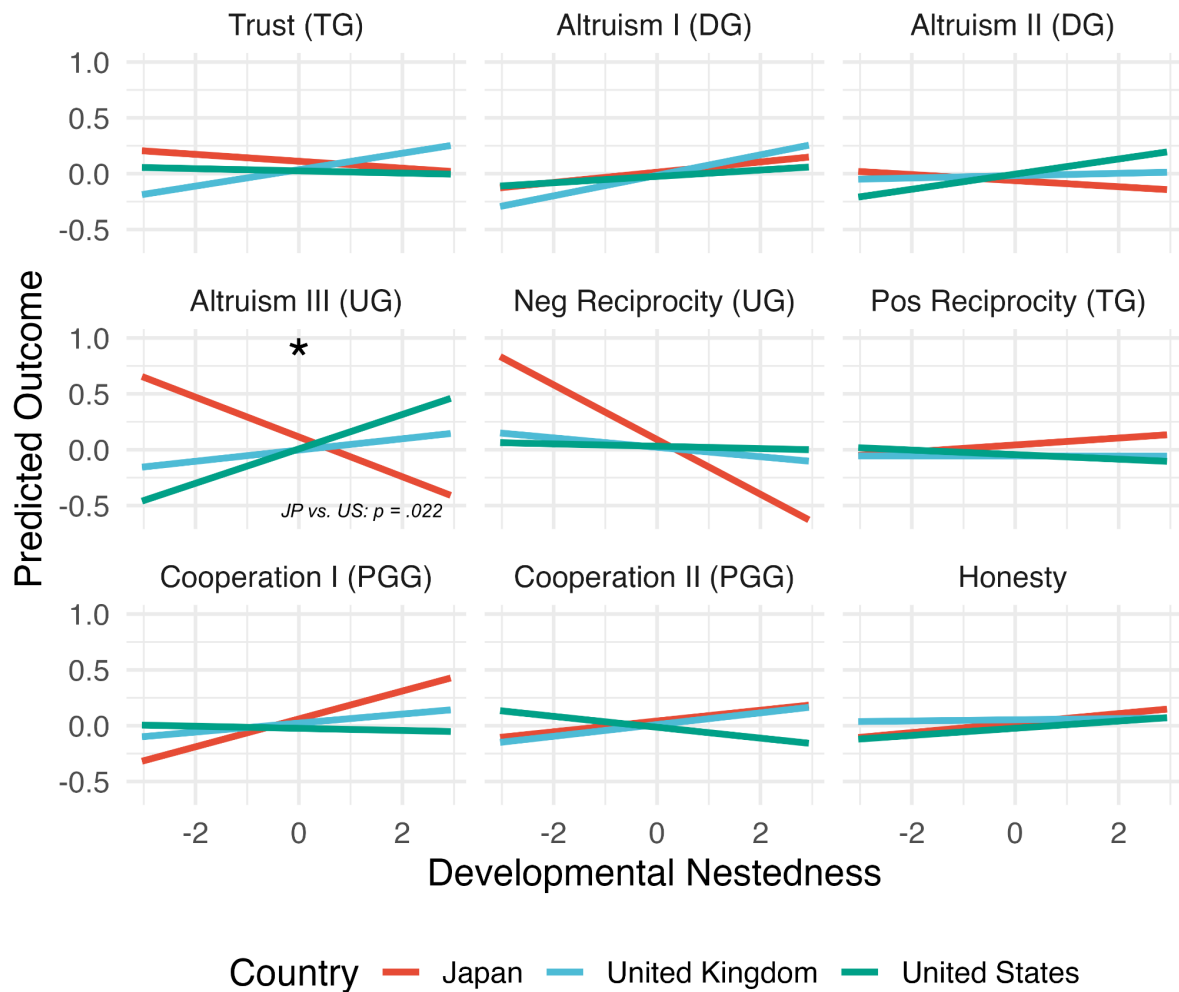

**Figure S4. Nestedness and Incentivised Prosociality Slopes Across Countries**

Plots show relationship between standardised developmental nestedness scores and standardised measures of incentivised prosociality in each country. Slopes were statistically equivalent for behaviour in the trust game (TG), dictator games (DG), and public goods games (PGG), and honesty in the coin-flip game. They were also equivalent for negative reciprocity in the ultimatum game (UG) but not altruism in this game, where more nested participants offered less in Japan, unlike in the US and the UK.

#### H4: Latent factors in evolved nest experiences will predict adult well-being and social capital

**Table S9. Evolved Nest Component and Factor Correlations**

Correlation coefficients representing associations between evolved nest component scores and positive and negative experience factor scores. Note: \*\*\* $p < .001$ , \*\* $p < .01$ , \* $p < .05$ .

| Evolved Nest Component | Japan    |          | UK       |          | US       |          |
|------------------------|----------|----------|----------|----------|----------|----------|
|                        | Positive | Negative | Positive | Negative | Positive | Negative |
| Positive Climate       | .64***   | -.20***  | .84***   | -.71***  | .87***   | -.60***  |
| Positive Touch         | .70***   | .13*     | .74***   | -.39***  | .71***   | -.38***  |
| Responsive Care        | .92***   | -.40***  | .95***   | -.81***  | .97***   | -.70***  |
| Social Embeddedness    | .72***   | -.03     | .82***   | -.46***  | .73***   | -.29***  |
| Play                   | .64***   | -.02     | .59***   | -.38***  | .45***   | -.16***  |
| Negative Climate       | -.44***  | .74***   | -.64***  | .98***   | -.66***  | .92***   |
| Negative Touch         | -.08     | .91***   | -.30***  | .52***   | -.24***  | .70***   |

**Table S10. Positive and Negative Experiences and Personal Well-being**

Results from adjusted linear regression models that include controls for current household income and highest level of education. Note: \*\*\* $p < .001$ , \*\* $p < .01$ , \* $p < .05$ .

| Country | Factor               | Term        | Estimate | CI Low | CI High | SE   | <i>t</i> | <i>p</i>  |
|---------|----------------------|-------------|----------|--------|---------|------|----------|-----------|
| Japan   | Positive Experiences | (Intercept) | -0.36    | -0.71  | -0.02   | 0.17 | -2.10    | .037*     |
|         |                      | Pos Exp     | 0.43     | 0.33   | 0.53    | 0.05 | 8.12     | < .001*** |
|         |                      | Income      | 0.11     | -0.01  | 0.23    | 0.06 | 1.79     | .075      |
|         |                      | Education   | 0.05     | -0.02  | 0.12    | 0.04 | 1.44     | .151      |
|         | Negative Experiences | (Intercept) | -0.72    | -1.08  | -0.36   | 0.18 | -3.94    | < .001*** |
|         |                      | Neg Exp     | -0.17    | -0.28  | -0.06   | 0.06 | -3.03    | .003**    |
|         |                      | Income      | 0.20     | 0.07   | 0.33    | 0.07 | 3.01     | .003**    |
|         |                      | Education   | 0.09     | 0.02   | 0.17    | 0.04 | 2.50     | .013*     |
| UK      | Positive Experiences | (Intercept) | -0.65    | -0.99  | -0.32   | 0.17 | -3.81    | < .001*** |
|         |                      | Pos Exp     | 0.50     | 0.42   | 0.58    | 0.04 | 12.22    | < .001*** |
|         |                      | Income      | 0.16     | 0.03   | 0.29    | 0.07 | 2.37     | .018*     |
|         |                      | Education   | 0.07     | 0.02   | 0.12    | 0.03 | 2.64     | .009**    |
|         | Negative Experiences | (Intercept) | -0.72    | -1.07  | -0.37   | 0.18 | -4.03    | < .001*** |
|         |                      | Neg Exp     | -0.42    | -0.50  | -0.34   | 0.04 | -9.97    | < .001*** |
|         |                      | Income      | 0.20     | 0.06   | 0.33    | 0.07 | 2.89     | .004**    |
|         |                      | Education   | 0.06     | 0.01   | 0.12    | 0.03 | 2.35     | .019*     |
| US      | Positive Experiences | (Intercept) | -0.68    | -1.09  | -0.28   | 0.21 | -3.30    | .001**    |
|         |                      | Pos Exp     | 0.40     | 0.31   | 0.49    | 0.04 | 9.14     | < .001*** |
|         |                      | Income      | 0.21     | 0.10   | 0.32    | 0.06 | 3.77     | < .001*** |
|         |                      | Education   | 0.02     | -0.04  | 0.08    | 0.03 | 0.63     | .526      |
|         | Negative Experiences | (Intercept) | -1.04    | -1.45  | -0.63   | 0.21 | -5.01    | < .001*** |
|         |                      | Neg Exp     | -0.29    | -0.38  | -0.21   | 0.04 | -6.82    | < .001*** |
|         |                      | Income      | 0.27     | 0.16   | 0.39    | 0.06 | 4.68     | < .001*** |
|         |                      | Education   | 0.05     | -0.01  | 0.12    | 0.03 | 1.75     | .081      |

**Table S11. Positive and Negative Experiences and Social Relationships**

Results from adjusted linear regression models that include controls for current household income and highest level of education. Note: \*\*\* $p < .001$ , \*\* $p < .01$ , \* $p < .05$ .

| Country | Factor               | Term        | Estimate | CI Low | CI High | SE   | <i>t</i> | <i>p</i>  |
|---------|----------------------|-------------|----------|--------|---------|------|----------|-----------|
| Japan   | Positive Experiences | (Intercept) | -0.26    | -0.60  | 0.08    | 0.17 | -1.49    | .139      |
|         |                      | Pos Exp     | 0.37     | 0.27   | 0.47    | 0.05 | 7.05     | < .001*** |
|         |                      | Income      | 0.12     | 0.00   | 0.24    | 0.06 | 1.92     | .056      |
|         |                      | Education   | 0.01     | -0.06  | 0.07    | 0.04 | 0.17     | .863      |
|         | Negative Experiences | (Intercept) | -0.56    | -0.91  | -0.21   | 0.18 | -3.17    | .002**    |
|         |                      | Neg Exp     | -0.14    | -0.24  | -0.03   | 0.05 | -2.49    | .013*     |
|         |                      | Income      | 0.20     | 0.07   | 0.32    | 0.07 | 3.03     | .003**    |
|         |                      | Education   | 0.04     | -0.03  | 0.12    | 0.04 | 1.18     | .239      |
| UK      | Positive Experiences | (Intercept) | -0.65    | -1.00  | -0.31   | 0.18 | -3.71    | < .001*** |
|         |                      | Pos Exp     | 0.52     | 0.44   | 0.61    | 0.04 | 12.60    | < .001*** |
|         |                      | Income      | 0.15     | 0.02   | 0.29    | 0.07 | 2.26     | .025*     |
|         |                      | Education   | 0.07     | 0.02   | 0.13    | 0.03 | 2.76     | .006**    |
|         | Negative Experiences | (Intercept) | -0.72    | -1.08  | -0.36   | 0.18 | -3.92    | < .001*** |
|         |                      | Neg Exp     | -0.45    | -0.54  | -0.37   | 0.04 | -10.49   | < .001*** |
|         |                      | Income      | 0.20     | 0.06   | 0.33    | 0.07 | 2.78     | .006**    |
|         |                      | Education   | 0.07     | 0.01   | 0.12    | 0.03 | 2.47     | .014*     |
| US      | Positive Experiences | (Intercept) | -0.27    | -0.68  | 0.15    | 0.21 | -1.28    | .203      |
|         |                      | Pos Exp     | 0.48     | 0.40   | 0.57    | 0.04 | 10.91    | < .001*** |
|         |                      | Income      | 0.13     | 0.02   | 0.25    | 0.06 | 2.34     | .02*      |
|         |                      | Education   | -0.01    | -0.07  | 0.05    | 0.03 | -0.36    | .723      |
|         | Negative Experiences | (Intercept) | -0.72    | -1.14  | -0.29   | 0.22 | -3.32    | .001**    |
|         |                      | Neg Exp     | -0.34    | -0.43  | -0.25   | 0.05 | -7.48    | < .001*** |
|         |                      | Income      | 0.21     | 0.09   | 0.33    | 0.06 | 3.43     | .001**    |
|         |                      | Education   | 0.03     | -0.03  | 0.10    | 0.03 | 1.03     | .303      |



**Table S12. Positive and Negative Experiences and General Prosociality**

Results from adjusted linear regression models that include controls for current household income and highest level of education. Note: \*\*\* $p < .001$ , \*\* $p < .01$ , \* $p < .05$ .

| Country | Factor               | Term        | Estimate | CI Low | CI High | SE   | <i>t</i> | <i>p</i>  |
|---------|----------------------|-------------|----------|--------|---------|------|----------|-----------|
| Japan   | Positive Experiences | (Intercept) | -0.14    | -0.50  | 0.23    | 0.18 | -0.74    | .462      |
|         |                      | Pos Exp     | 0.26     | 0.15   | 0.37    | 0.06 | 4.57     | < .001*** |
|         |                      | Income      | 0.08     | -0.05  | 0.21    | 0.07 | 1.24     | .217      |
|         |                      | Education   | 0.01     | -0.07  | 0.08    | 0.04 | 0.21     | .832      |
|         | Negative Experiences | (Intercept) | -0.38    | -0.74  | -0.03   | 0.18 | -2.10    | .036*     |
|         |                      | Neg Exp     | 0.06     | -0.05  | 0.17    | 0.06 | 1.09     | .277      |
|         |                      | Income      | 0.16     | 0.03   | 0.29    | 0.07 | 2.45     | .015*     |
|         |                      | Education   | 0.03     | -0.05  | 0.10    | 0.04 | 0.70     | .487      |
| UK      | Positive Experiences | (Intercept) | -0.26    | -0.66  | 0.14    | 0.20 | -1.30    | .195      |
|         |                      | Pos Exp     | 0.26     | 0.17   | 0.36    | 0.05 | 5.49     | < .001*** |
|         |                      | Income      | 0.09     | -0.06  | 0.24    | 0.08 | 1.16     | .248      |
|         |                      | Education   | 0.01     | -0.05  | 0.07    | 0.03 | 0.43     | .667      |
|         | Negative Experiences | (Intercept) | -0.35    | -0.76  | 0.06    | 0.21 | -1.69    | .092      |
|         |                      | Neg Exp     | -0.12    | -0.21  | -0.02   | 0.05 | -2.41    | .016*     |
|         |                      | Income      | 0.14     | -0.02  | 0.29    | 0.08 | 1.71     | .088      |
|         |                      | Education   | 0.01     | -0.05  | 0.07    | 0.03 | 0.33     | .745      |
| US      | Positive Experiences | (Intercept) | -0.34    | -0.78  | 0.10    | 0.23 | -1.51    | .131      |
|         |                      | Pos Exp     | 0.18     | 0.09   | 0.28    | 0.05 | 3.86     | < .001*** |
|         |                      | Income      | 0.17     | 0.05   | 0.29    | 0.06 | 2.70     | .007**    |
|         |                      | Education   | -0.02    | -0.08  | 0.05    | 0.03 | -0.51    | .609      |
|         | Negative Experiences | (Intercept) | -0.48    | -0.90  | -0.05   | 0.22 | -2.20    | .028*     |
|         |                      | Neg Exp     | -0.17    | -0.26  | -0.08   | 0.05 | -3.69    | < .001*** |
|         |                      | Income      | 0.19     | 0.07   | 0.31    | 0.06 | 3.12     | .002**    |
|         |                      | Education   | 0.00     | -0.07  | 0.06    | 0.03 | -0.11    | .912      |

**Table S13. Positive and Negative Experiences and Incentivised Prosociality**

Results from adjusted linear regression models that include controls for current household income and highest level of education. Note: \*\*\* $p < .001$ , \*\* $p < .01$ , \* $p < .05$ .

| Country | Factor               | Term        | Estimate | CI Low | CI High | SE   | <i>t</i> | <i>p</i>  |
|---------|----------------------|-------------|----------|--------|---------|------|----------|-----------|
| Japan   | Positive Experiences | (Intercept) | 0.02     | -0.36  | 0.39    | 0.19 | 0.09     | .932      |
|         |                      | Pos Exp     | 0.11     | 0.00   | 0.23    | 0.06 | 1.93     | .055      |
|         |                      | Income      | 0.03     | -0.10  | 0.17    | 0.07 | 0.48     | .633      |
|         |                      | Education   | -0.01    | -0.09  | 0.07    | 0.04 | -0.27    | .787      |
|         | Negative Experiences | (Intercept) | -0.15    | -0.50  | 0.21    | 0.18 | -0.82    | .412      |
|         |                      | Neg Exp     | 0.25     | 0.14   | 0.36    | 0.06 | 4.58     | < .001*** |
|         |                      | Income      | 0.11     | -0.02  | 0.24    | 0.07 | 1.68     | .094      |
|         |                      | Education   | -0.01    | -0.09  | 0.06    | 0.04 | -0.35    | .728      |
| UK      | Positive Experiences | (Intercept) | 0.17     | -0.25  | 0.58    | 0.21 | 0.79     | .431      |
|         |                      | Pos Exp     | 0.08     | -0.02  | 0.18    | 0.05 | 1.64     | .101      |
|         |                      | Income      | -0.07    | -0.23  | 0.09    | 0.08 | -0.90    | .370      |
|         |                      | Education   | 0.00     | -0.06  | 0.07    | 0.03 | 0.06     | .953      |
|         | Negative Experiences | (Intercept) | 0.14     | -0.28  | 0.55    | 0.21 | 0.64     | .521      |
|         |                      | Neg Exp     | -0.03    | -0.13  | 0.07    | 0.05 | -0.62    | .536      |
|         |                      | Income      | -0.06    | -0.22  | 0.10    | 0.08 | -0.70    | .482      |
|         |                      | Education   | 0.00     | -0.06  | 0.06    | 0.03 | 0.03     | .977      |
| US      | Positive Experiences | (Intercept) | -0.04    | -0.52  | 0.44    | 0.24 | -0.17    | .863      |
|         |                      | Pos Exp     | 0.04     | -0.06  | 0.14    | 0.05 | 0.72     | .470      |
|         |                      | Income      | -0.06    | -0.19  | 0.07    | 0.07 | -0.88    | .379      |
|         |                      | Education   | 0.03     | -0.04  | 0.10    | 0.04 | 0.74     | .457      |
|         | Negative Experiences | (Intercept) | -0.12    | -0.58  | 0.34    | 0.23 | -0.52    | .602      |
|         |                      | Neg Exp     | 0.03     | -0.07  | 0.13    | 0.05 | 0.64     | .522      |
|         |                      | Income      | -0.05    | -0.18  | 0.08    | 0.07 | -0.72    | .474      |
|         |                      | Education   | 0.04     | -0.03  | 0.10    | 0.04 | 0.99     | .321      |

## Incentivised Prosociality Across Countries

In the main text, we stated that participants' decisions in the economic games were broadly consistent with those made by previous participants.

In a meta-analysis of Trust Game results, for example, participants from Japan, the UK, and the US were found on average to send 58%, 54%, and 51% of their endowment; and to return 32%, 28%, and 34% of whatever was sent, respectively (Johnson & Mislin, 2011). This was similar to the average proportion sent and returned by participants in Japan (sent: 52%; returned: 37%), the UK (sent: 46%; returned: 28%), and the US (sent: 51%; returned: 31%) in the present study. Relatedly, in a study of 600 non-student residents of Tokyo, 19.2% of senders sent nothing, 22.3% sent half of their endowment, and 16.8% sent the full amount (Yamagishi et al., 2015). In comparison, senders in our Japanese sample were more likely to send half (33.1%) than nothing (8.7%) or everything (8.7%). In the UK (US), 16.2% (10.3%) sent nothing, 39.9% (42.6%) sent half, and 12.6% (14.7%) sent everything. These results are consistent with previous findings that American (vs. Japanese) respondents are more trusting of other people in general (Yamagishi & Yamagishi, 1994).

In the Dictator Game, a recent meta-study reported that non-students on average give 40% of their endowment, which was similar to the proportion given by participants in our study (Engel, 2011). Another study in Japan reported that 514 non-student participants on average gave 29.3% of their endowment (Ogawa et al., 2020), which was less than Japanese participants in our sample gave in the standard version of the Dictator Game (43.0%). These participants were also more altruistic than British (33.6%) and American (39.2%) participants in this study.

In the Ultimatum Game, the most common offer from proposers is a 50-50 split and around half of responders reject 'unfair' offers of less than 30% of the total sum (Camerer, 2003). Previous authors have reported that 43% of participants in Japan rejected unfair offers (Yamagishi et al., 2012). Here, 40.3% of Japanese participants stated that they would reject 'unfair' offers, which was consistent with previous findings and higher than the proportion of British (28.1%) and American (32.8%) who did so.

In the Public Goods Game, participants in the UK contributed 47.4% of their endowment (£4.74) and those in the US contributed 52.8% (\$5.28). These figures were not significantly different ( $t(444) = 1.70$ ,  $p = .090$ ). This is consistent with previous findings that participants from the UK and the US contributed similarly (35-40% of their endowment) to a common pot (Weber et al., 2023). Participants in Japan contributed more in this study (50.6%) than in a previous study (36.0%) although this was based on a smaller sample size ( $n = 96$ ).

Lastly, in the coin-flip game, Japanese participants appeared to be more honest (reporting an average of 4.99, or 49.9% heads) than British (5.80, or 58.0% heads) and American (5.68 heads) participants. In a previous cross-cultural study (Hugh-Jones, 2016) participants from these countries reported 81%, 52%, and 66% heads, respectively.

## Developmental Nestedness and Socioeconomic Status

An important empirical question is whether differences in developmental nestedness simply reflect differences in socioeconomic status. Is it the case that people from higher socioeconomic backgrounds are more developmentally nested? And what is the nature of this relationship? We investigated this by comparing a linear model of the relationship between participants' subjective socioeconomic status when they were growing up and their developmental nestedness with a model that included a quadratic term. We used subjective socioeconomic status rather than reported income as this is more easily comparable across countries. The addition of the quadratic term significantly improved model fit ( $F(1,1282) = 53.93, p < .001$ ). The coefficient estimates from this model highlighted a positive effect of perceived family socioeconomic status ( $\beta = 0.46, SE = 0.05, t = 10.0, p < .001$ ) but a negative quadratic term ( $\beta = -0.03, SE = 0.00, t = 7.34, p < .001$ ) indicated a curvilinear relationship. This relationship is illustrated in Figure S5a. We also compared linear and quadratic models of the relationship between participants' subjective socioeconomic status and their positive and negative experience factor scores. As before, the addition of the quadratic term improved model fit for both positive experiences ( $F(1,1272) = 35.78, p < .001$ ) and negative experiences ( $F(1,1272) = 37.78, p < .001$ ). For positive experiences, we detected a positive linear effect of family socioeconomic status ( $\beta = 0.56, SE = 0.06, t = 9.1, p < .001$ ) and a negative quadratic effect ( $\beta = -0.04, SE = 0.01, t = 6.0, p < .001$ ). For negative experiences, we detected a negative linear effect ( $\beta = -0.51, SE = 0.06, t = 7.8, p < .001$ ) and a positive quadratic effect ( $\beta = 0.04, SE = 0.01, t = 6.1, p < .001$ ). These results similarly indicated that the relationships between family socioeconomic status and positive and negative childhood experiences were both curvilinear, as shown in Figure 5b.

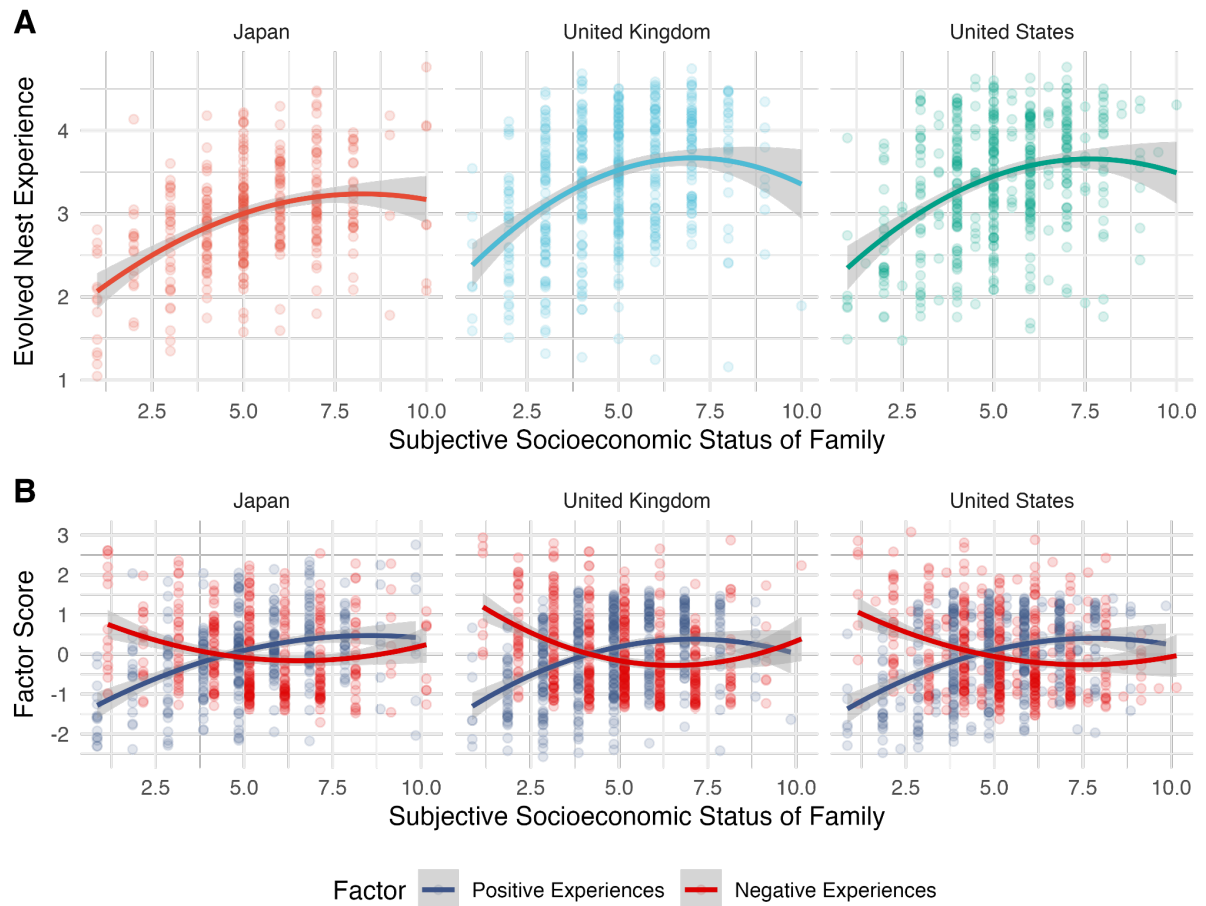

**Figure S5. Early Life Experience and Subjective Socioeconomic Status**

Plots show the non-linear relationships between family subjective socioeconomic status and developmental nestedness. Plot A shows that developmental nestedness increases with socioeconomic status and then starts to fall. Plot B shows that positive experiences follow a similar trend, whereas negative experiences decrease with socioeconomic status before increasing again at the higher end of the scale. Lines are from models with quadratic terms.

## Developmental Nestedness and Trust

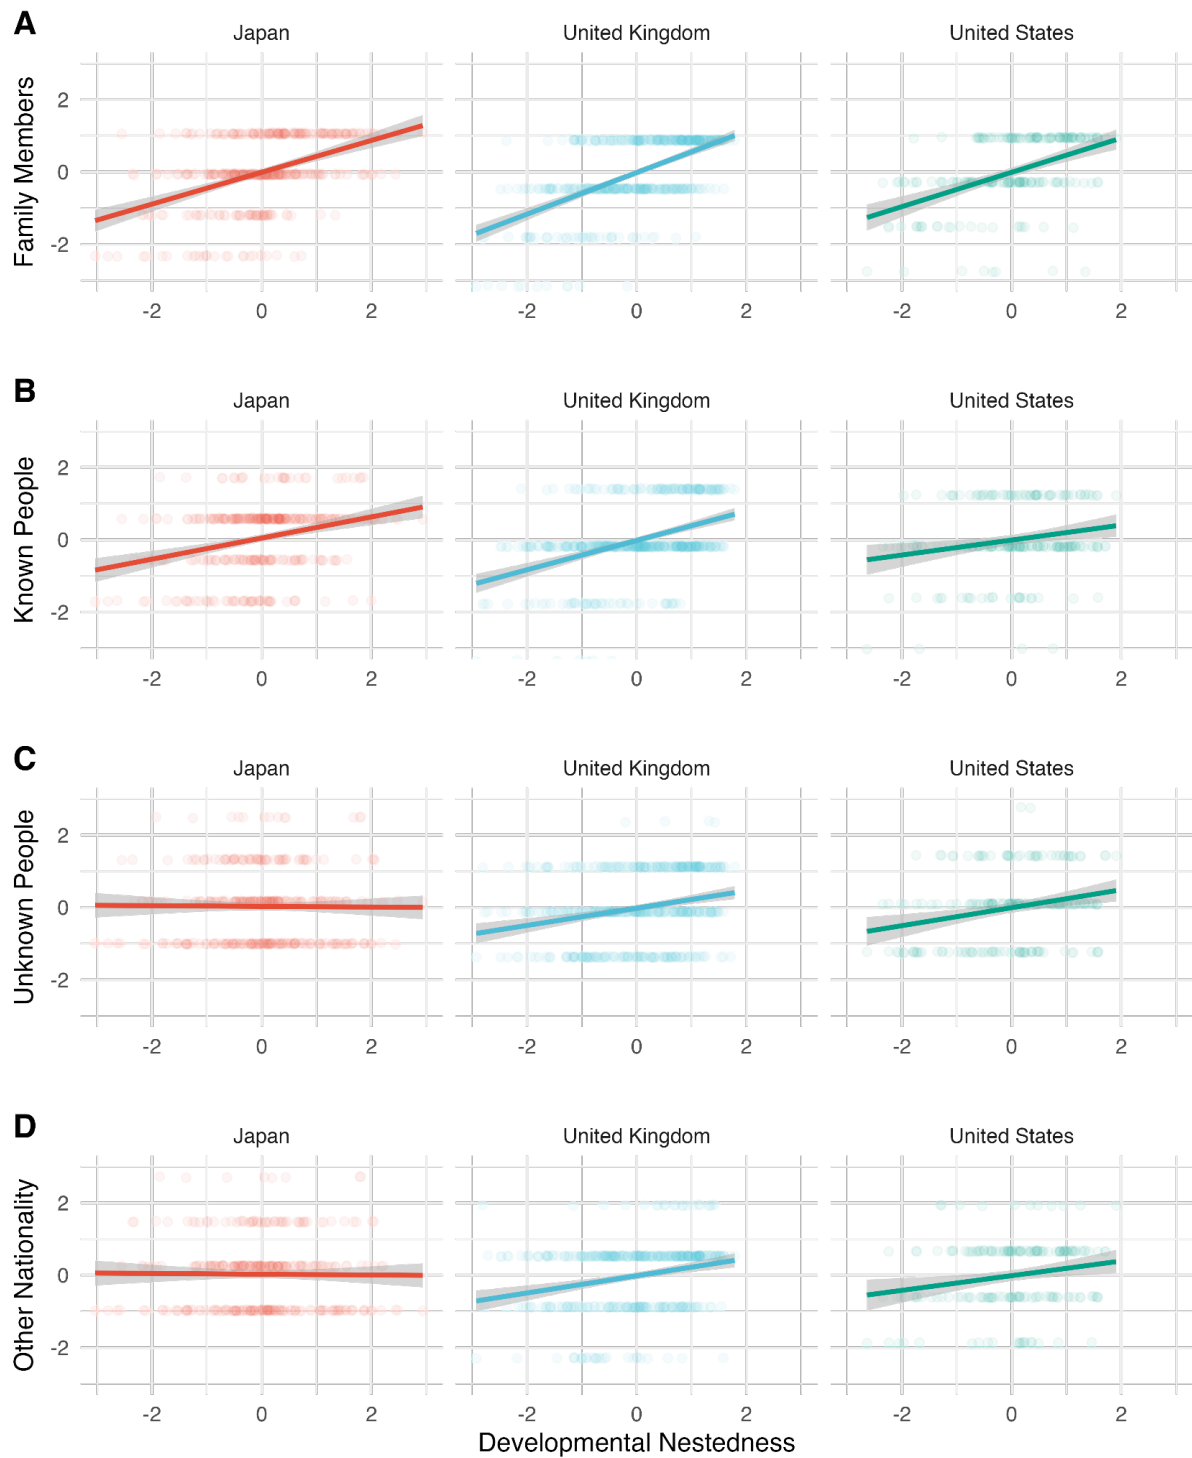

**Figure S6. Developmental Nestedness and Trust in Others**

Plots show the relationship between people's developmental nestedness and their trust in family members (A), people they know (B), people they don't know (C), and people from another nationality (D). These relations remain positive in the UK and the US, but not in Japan, where trust in unknown people and those from another nationality does not increase with developmental nestedness.

## **Self-Reported vs. Incentivised Prosociality**

In the main text, we discussed the association between self-reported and incentivised measures of prosociality. Overall, we detected weak positive correlation between standardised scores of prosociality and incentivised prosociality across countries ( $r = .18$ ,  $t(1,399) = 6.77$ ,  $p < .001$ ). Within countries, this correlation was strongest in Japan ( $r = .27$ ,  $t(418) = 5.83$ ,  $p < .001$ ), weaker in the UK ( $r = .15$ ,  $t(487) = 3.36$ ,  $p < .001$ ), and weakest in the US ( $r = .12$ ,  $t(490) = 2.74$ ,  $p = .006$ ). These results are visualised in Figure S7, along with correlations between individual measures of self-reported and incentivised prosociality, all of which were standardised within each country.

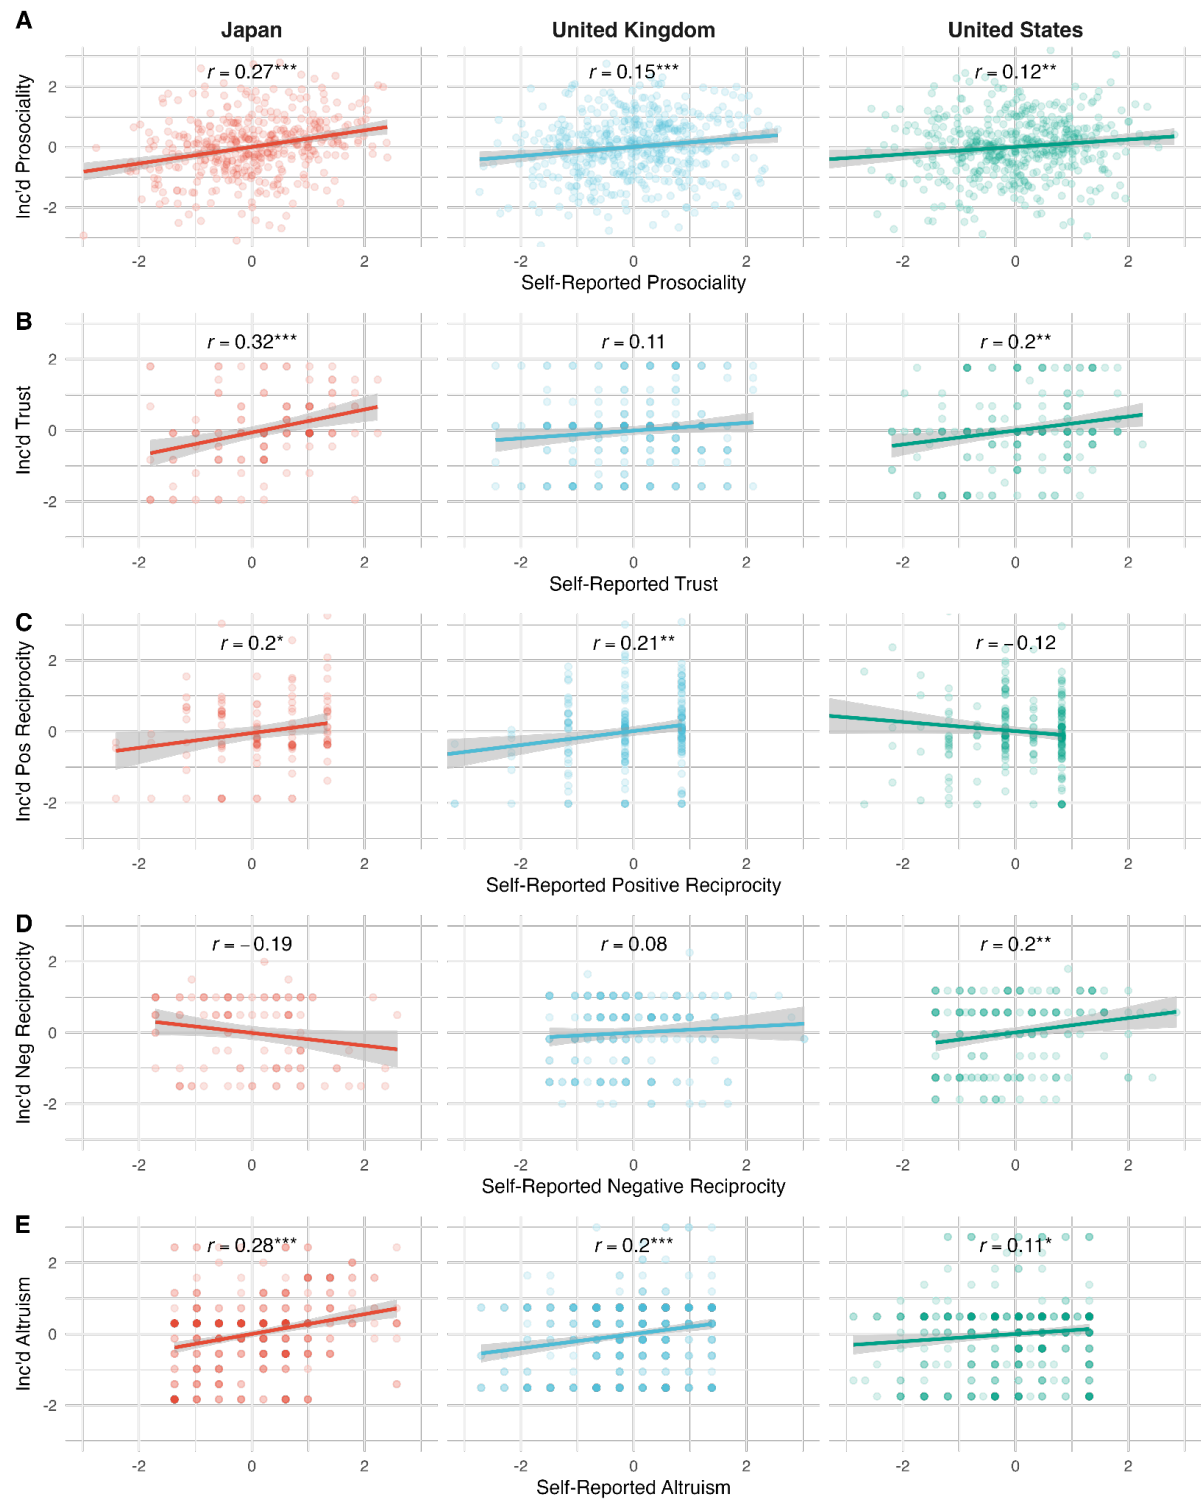

**Figure S7. Self-Reported and Incentivised Measures**

Plots show correlations between standardised self-reported and incentivised measures of prosociality in each country. Points represent raw data and lines are linear regression lines. Plot A shows that the relationship between overall prosociality scores is strongest in Japan. Plot B shows self-reported and incentivised trust (average funds sent in the Trust Game). Plot C shows self-reported and incentivised positive reciprocity (the average proportion of funds returned in the Trust Game). Plot D shows self-reported and incentivised negative reciprocity (minimum offer accepted in the Ultimatum Game). Plot E shows self-reported and incentivised altruism (amount given in the Dictator Game).



## References

- Camerer, C. (2003). *Behavioral Game Theory: Experiments in Strategic Interaction*. Princeton University Press.
- Engel, C. (2011). Dictator games: A meta study. *Experimental Economics*, 14(4), 583–610.
- Hugh-Jones, D. (2016). Honesty, beliefs about honesty, and economic growth in 15 countries. *Journal of Economic Behavior & Organization*, 127, 99–114.
- Johnson, N. D., & Mislin, A. A. (2011). Trust games: A meta-analysis. *Journal of Economic Psychology*, 32(5), 865–889.
- Ogawa, K., Kawamura, T., & Matsushita, K. (2020). Effects of cognitive ability and age on giving in dictator game experiments. *Research in Economics*, 74(4), 323–335.
- Weber, T. O., Schulz, J. F., Beranek, B., Lambarraa-Lehnhardt, F., & Gächter, S. (2023). The behavioral mechanisms of voluntary cooperation across culturally diverse societies: Evidence from the US, the UK, Morocco, and Turkey. *Journal of Economic Behavior & Organization*, 215, 134–152. <https://doi.org/10.1016/j.jebo.2023.09.006>
- Yamagishi, T., Akutsu, S., Cho, K., Inoue, Y., Li, Y., & Matsumoto, Y. (2015). Two-component model of general trust: Predicting behavioral trust from attitudinal trust. *Social Cognition*, 33(5), 436–458.
- Yamagishi, T., Horita, Y., Mifune, N., Hashimoto, H., Li, Y., Shinada, M., Miura, A., Inukai, K., Takagishi, H., & Simunovic, D. (2012). Rejection of unfair offers in the ultimatum game is no evidence of strong reciprocity. *Proceedings of the National Academy of Sciences*, 109(50), 20364–20368.
- Yamagishi, T., & Yamagishi, M. (1994). Trust and commitment in the United States and Japan. *Motivation and Emotion*, 18(2), 129–166.
